# Supplementary material
Source: PubMed Central journal article supplement (PMC3944828)
Supplement: mmc1.pdf [file mmc1.pdf]

## **Supporting Material**

### **Mechanism of calponin stabilization of crosslinked actin networks**

Mikkel Herholdt Jensen, Eliza J. Morris, Cynthia M. Gallant, Kathleen G. Morgan,  
David A. Weitz, Jeffrey R. Moore

Corresponding author:

Jeffrey R. Moore  
Boston University School of Medicine  
Department of Physiology and Biophysics  
72 East Concord Street  
Boston, MA 02118  
phone: 617-638-4251  
fax: 617-638-4273  
jxmoore@bu.edu

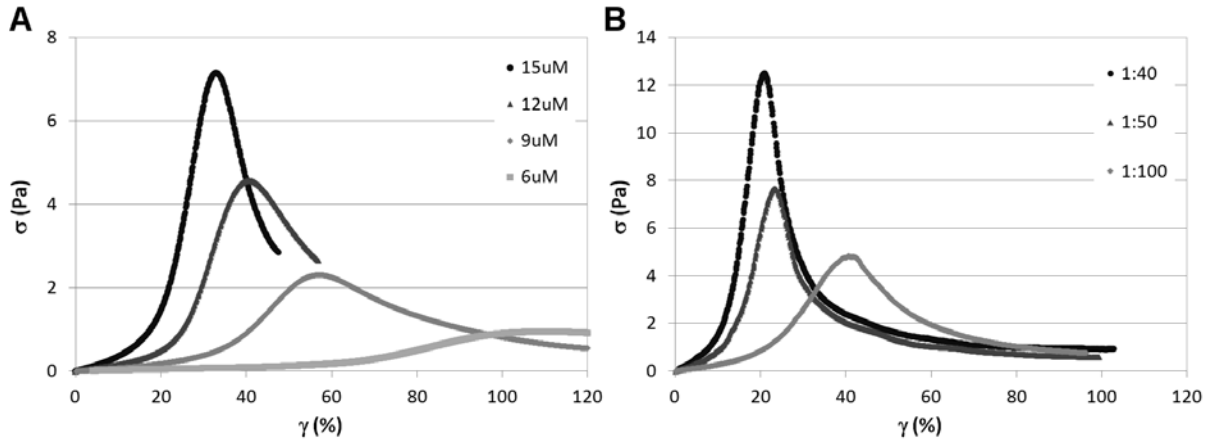

**Figure S1:** Effects of actin concentration and crosslinking density on network rheology. Crosslinked actin networks with a constant ratio of biotinylated actin to plain actin of 1:100 and variable actin concentrations (A), and a constant actin concentration of 15  $\mu$ M with various crosslinking densities (B) were polymerized and strained as described in the Materials and Methods. The maximal network strain,  $\gamma_{\max}$ , is increased by either lowering the actin concentration or the crosslinking density; however, in both cases the maximal stress,  $\sigma_{\max}$ , is decreased, contrary to what is seen in actin networks with calponin.
